# Supplementary material
Source: PubMed Central journal article supplement (PMC2483366)
Supplement: tpc.108.058610_1.pdf [file tpc.108.058610_1.pdf]

**Supplemental data Vega-Sanchez et al (2008).** SPIN1, a K homology domain protein negatively regulated and ubiquitinated by the E3 ubiquitin ligase SPL11, is involved in flowering time control in rice

KH domain

```

SPIN1 : ---FVVKKILRLDVPVDSYFNFVGRILGPRGNSLREYFESTGGRVETRGKGSFKIEGKEDKIRGKGYEHLSDLEHLLTAEFPASIIDARTRHACFYIEELLKPE---VDE : 237
GLD-1 : --GDMISITERHYVVKNEYPLNFVGRILGPRGNTAKQLEQETGCKIMVRGKGSMDKSKESAEHRGKNWEHLDDLHVLIQCEDTENRVHKLQPALEQVVKLLLP---APE : 308
HOW : PEGSVVTMNEKVVYVPEPEPDFNFVGRILGPRGNTAKQLEQETGCKIMVRGKGSMDKSKEDANRGKPNWEHLSDDLHVLIQEDTENRATVKIACAVEVCKLLVPE---QAE : 240
SF1 : -KPPATRVSLKVMHEDDEYFELNFVGLLIGPRGNTLNIEFECNPKIMIRGKGSVKE-GKVGKRLAQ-MLPGEDELEHLLVTAINTEN----VKKAVEQTRNLEKQGIETPE : 235
---G-VV---EKVYVVPVDEYPDFNFVGRILGPRG-TAKQLEQETGCKIM-RGKGSMDKSKEDA-RGKPNWEHLS-DLHVLI-TAEDTENR---KL---AVEQ---KLLKP---PE

```

QUA2 domain

```

SPIN1 : SQDFYKRCQLRELAMINSTLR-EDSPFEGSVSP- : 269
GLD-1 : GDELKRRQLMELAIINGTTRRPMFSPNBARVMTA : 342
HOW : GDELKRRQLMELAIINGTTR----- : 261
SF1 : RCNDELKRRQLRELAIINGTTRRLEINRILRPWQ-- : 267
GQDELK--QL-ELAI-NGT-RE-DSP-P--V---

```

**Supplemental figure 1.** Alignment of the STAR domain of SPIN1 with mammalian protein members of the family. Gld-1, from *C. elegans*; Sf1 from human; How, from *Drosophila melanogaster*. Multiple sequence alignment was done using ClustalX and conserved residue shading performed using GeneDoc. Amino acid similarity between SPIN1 and GLD-1, HOW and SF-1 is 69%, 69% and 59%, respectively.

```

SPIN1      : ---MSG-LYS-PGFSPARNLS---PQIRSNLT---LVLSQYLAELLAEHQKLGPFMQLPICS : 52
NP001045029: MDDRIPPEPFLQYSSPSSPHLSS-IRYSSS---ERERYLAELLAERQKLPAPFVQLPACT : 60
NP001055572: MDERIPPEAFFQFLSCAFSSPHHCSF-IRSPSS---ERERYLAELLAERQKLPAPFVQLPACT : 60
NP001059216: ---MSGLYNHQGFSPARTLS---PQIRSNLT---EATLQYLSPELLAEHKLGPFMQVLPICS : 53
NP001055861: ---MGLHGTDGCFSEERANS---PQIRSNLT---EATLQYLSPELLAEHKLGPFMQVLPICS : 57
NP001044630: ---NEALINAEKCFSPARAMSF--IPLVREPESECAA--GOYLAELLQEQKLPFVQLPICS : 57
EAY87341   : ---MAGRYMAYSFSPSTTPHSFRTIPLVRAASSA-VAQCFRYLAELLAERHKLSPHTEVLENSV : 60
At3g08620 : ---MSGLYNN-NFSPARAAS---PQIRSNLT---DVDS-QYLSPELLAEHKLGPFMQVLPICS : 53
At2g38610 : ---MSGLYNNSYFSPARAAS---PQIRSNLT---IDSS-QYLSPELLAEHKLGPFMQVLPICS : 54
Nt_BAD06470: ---MSGLYNNHNFSPARAAS---PQIRSNLT---DVDSNQYLSPELLAEHKLGPFMQVLPICS : 55
Mt_ABE77708: ---NYNQTESLSSCRINS---FNINMRSN--FLAEQYVLELLEHKLGPFMQVLPICS : 52
          ---MSGLYN---FSP-R--S---PQ-R-----QYL-ELLAEHQKLGPFMQLPICS

```

```

SPIN1      : ILLSQEILRVST---IVENHGFQDFDRFRFRSPSPMSSNFRSNFSGNCFSEWNGLEQERLGGP : 113
NP001045029: RLLNQEILRVSS---LPPNHNVDEREHEHSE--LRLTGLPVNCGPMILEGWS-GMOTENMRV : 118
NP001055572: RLLNQEILRVSS---LPPNHNVFVEPERVNHGSE--LRLTGFPMNCGPMILEGWS-GMOTENMRV : 117
NP001059216: RLLNQEILRVST---MVNDEGENDFDRFRFRSPSPMSSIMRPNHFGNCFGWNGLEQERLGGP : 114
NP001055861: RLLNQEILRVSG---MERQEGVDFERSQCPSPNQMHLSHIVENPCGNVAFGWNGMFRFERSVSS : 118
NP001044630: RLLNQEILRVSA---IVSHLGVREDFRIFLSPNQMHLLPQVENFCGNGENFVWGLPEVNGHFE : 118
EAY87341   : RLLNQEILRVST---ILENASILNQSCLEHSE--ITTGCTVSNQAAALMNGWTEAFQCSF---- : 115
At3g08620 : RLLNQEILRVTC---MVPNQGFDLDFRLRHRSPSPMASNLMNSVSCGLGGWNGLEPERLGGSE : 114
At2g38610 : RLLNQEILRVSG---MVPNQGFDLDFRLRHRSPSPMASNLMNSVSNVGLGGWNGLEQERLGGT : 115
Nt_BAD06470: RLLNQEILRVSG---MVPNQGFDLDFRLRHRSPSPMASNLMNSVSCGLGGWNGLEQERLGGSE : 116
Mt_ABE77708: RLLNQEILRVSGKNGLLIQHQGFDFDRVQEMNCSFEMASSLIRENETIC-----WNLSHDMIAEV : 112
          RLLNQEI-RVS-----DR--H-SP--M-----N--G-----W-G--QE-----

```

```

SPIN1      : ---QGTSMDWQC-APESPSSHVVKILRLDVPVDSYPNFNFVGRLLGPRGNSLKRVEASTGCRV : 173
NP001045029: I---CASSMGWNG-EPALIGTEVVKKVRLEDVVDVYPNVNFVGRLLGPRGNSLKRVEASTGCRV : 179
NP001055572: I---QESMGWNV-APGVAGSEVVKKVRLEDVVDVYPNVNFVGRLLGPRGNSLKRVEASTGCRV : 178
NP001059216: PFPFICGTSMDWQC-APESPSSYIVKKIIRVMEVVDVAYPNFNFVGRLLGPRGNSLKRVEASTGCRV : 178
NP001055861: ---QG-EGWQC-AECPSSYIVKKILRLLEPTDAYPNFVGRLLGPRGNSLKRVEASTGCRV : 176
NP001044630: ---RGLMGWEG-APHEP-SYIVKKIIRLLEPTDAYPNFVGRLLGPRGNSLKRVEASTGCRV : 176
EAY87341   : ---GSPYSWVGGSCQSSSGLIVKKIKRWDVVDVYPNFNFVGRLLGPRGNSLKRVEASTGCRV : 176
At3g08620 : ---GMLMFWQC-APASPSYIVKILRLDVPVYYPNFNFVGRLLGPRGNSLKRVEASTGCRV : 174
At2g38610 : ---RGLMDWQC-APESPSSYIVKILRLLEPVDVYPNFNFVGRLLGPRGNSLKRVEASTGCRV : 175
Nt_BAD06470: ---RGLMDWQC-APASPSYIVKILRLLEPVDVYPNFNFVGRLLGPRGNSLKRVEASTGCRV : 176
Mt_ABE77708: ---RGLMDWQT-APVWENSIVKILRLDLEPVDVYPNFNFVGRLLGPRGNSLKRVEASTGCRV : 172
          -----M-W-G-AP-SP-S--VKKI-RL--PVD-YPNFNFVGRLLGPRGNSLKRVEASTGCRV

```

**KH domain**

```

SPIN1      : YIRGKGSIKDPEKEIKLRGKPGYEHLNDPLHLIEAELPANIIDRLRQAQEIIEELLKPVDESQ : 238
NP001045029: YIRGKGSVSDSVKELKLRGKPGYEHLNPLHLVVEAEFPAGIIDTRLNQAQEIIEELLKPVDESQ : 244
NP001055572: YIRGKGSVSDSVKELKLRGKPGYEHLNDPLHLVVEAEFPAGIIDTRLNQAQEIIEELLKPVDESQ : 243
NP001059216: YIRGKGSIKDPEKEIKLRGKPGYEHLNDPLHLIEAELPANIIDRLRQAQEIIEELLKPVDESQ : 243
NP001055861: YIRGKGSIKDPEKEIKLRGKPGYEHLNDPLHLIEAELPANIIDRLRQAQEIIEELLKPVDESQ : 241
NP001044630: YIRGKGSIKDPEKEIKLRGKPGYEHLNDPLHLIEAELPANIIDRLRQAQEIIEELLKPVDESQ : 241
EAY87341   : YIRGKGSIKDPEKEIKMRGKPGYEHLNPLHLVVEAELEVEIIDRLRQAQEIIEELLKPVDESQ : 241
At3g08620 : YIRGKGSIKDPEKEIKLRGKPGYEHLNPLHLIEAELPANIIDRLRQAQEIIEELLKPVDESQ : 239
At2g38610 : YIRGKGSIKDPEKEIKLRGKPGYEHLNPLHLIEAELPANIIDRLRQAQEIIEELLKPVDESQ : 240
Nt_BAD06470: YIRGKGSIKDPEKEIKLRGKPGYEHLNPLHLIEAELPANIIDRLRQAQEIIEELLKPVDESQ : 241
Mt_ABE77708: YIRGKGSIKDPEKEIKLRGKPGYEHLNPLHLIEAELPANIIDRLRQAQEIIEELLKPVDESQ : 234
          -IRGKGS6KDP-KE-KLRGKPGYEHLN-PLHLIEAELPA-I-D-RL-QAQEI-EELLKPVDESQ

```

**QUA2 domain**

```

SPIN1      : DYKRRQQLRELAMLNST-LREES---PEP-GSVSPFS-NGGMKRAKTGC : 281
NP001045029: DYKRRQQLRELALNGT-LREESPSPHLSP--SVSPFN-STGMKRAKTGR : 290
NP001055572: DYKRRQQLRELALNGT-LREESPSPHLSP--SVSPFN-STGMKRAKTGR : 291
NP001059216: DYKRRQQLRELAMLNST-LREES---PEP-GSVSPFS-NGGMKRAKPSH : 286
NP001055861: DYKRRQQLRELALNSP-LREES---PEP-GSASPF--NGGMKRAKRC-- : 282
NP001044630: DEKRRQQLRELAVLNST-YREES---PEQNGSASPF--NGSFKLQKQ-- : 283
EAY87341   : DEKRRQQLRELAMLNGT-LREES---MQRSGSAPPHNSIGMKRAKTGR : 286
At3g08620 : DYKRRQQLRELALNSN-LREESPG--PSG--SVSPFN-SNMKRAKTGR : 283
At2g38610 : DEKRRQQLRELALNSN-LREESPG--PSGGGSVSPFN-S-SCKRAKTGC : 286
Nt_BAD06470: DYKRRQQLRELALNSN-LREESPG--PSG--SVSPFN-SGGKRAKTGR : 285
Mt_ABE77708: ---HIC----- : 237
          DY-KRQQLRELA-LNST-LRE-SP---P---GSVSPF--S-GMKRAKTG-

```

**Supplemental figure 2.** Alignment of plant SPIN1-like proteins. Alignment was done as described for supplemental figure 1.

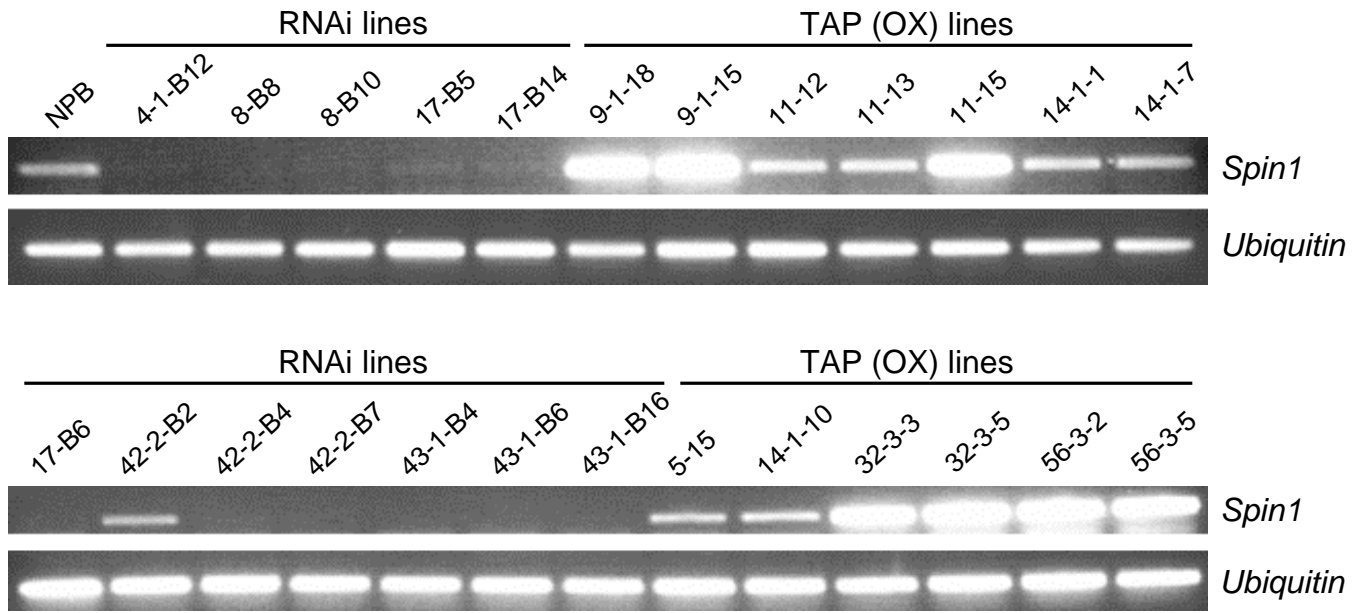

**Supplemental Figure 3.** RT-PCR analysis of *Spin1* expression in T2 transgenic RNAi and TAP (overexpression) lines. NPB: Nipponbare (recipient cultivar).

**A.**

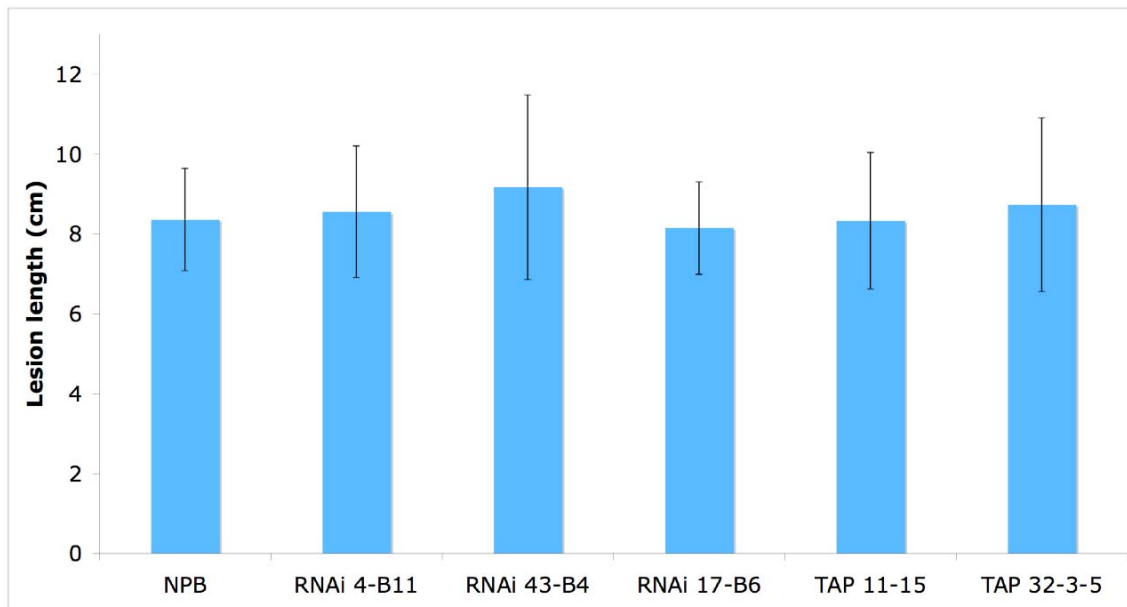

**B.**

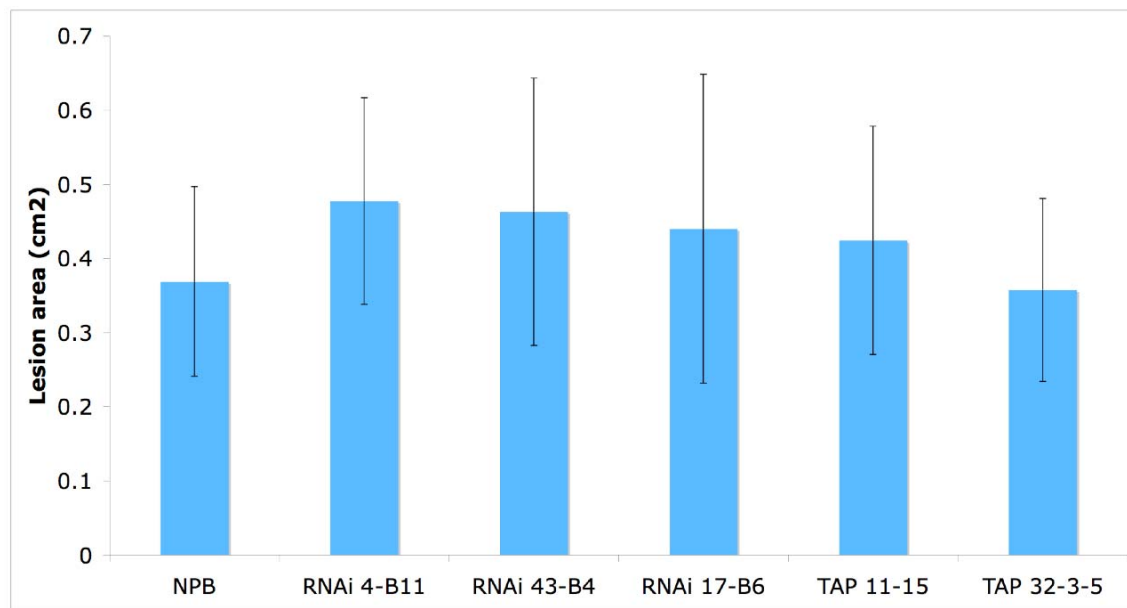

**Supplemental figure 4.** Rice blast and bacterial blight inoculation response of *Spin1*-RNAi and *Spin1*-OX lines. **A.** Lesion length of *Spin1* transgenic plants inoculated with *X. oryzae* pv. *oryzae* race J22. TAP lines are lines overexpressing *Spin1*. **B.** Lesion area of *Spin1* transgenic plants inoculated with *M. oryzae* isolate Che86. Error bars: +/- standard deviation. A minimum of 10 leaves per genotype were inoculated.

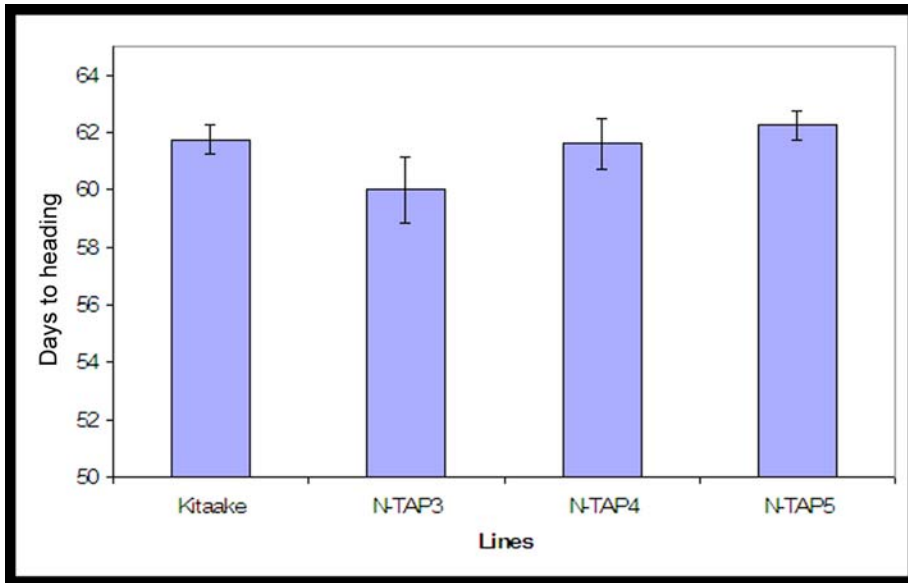

**Supplemental Figure 5.** Days to heading in NTAP transgenic lines transformed with the empty TAP tag vector used for generation of *Spin1*-TAP lines. Recipient cultivar for transformation is Kitaake.

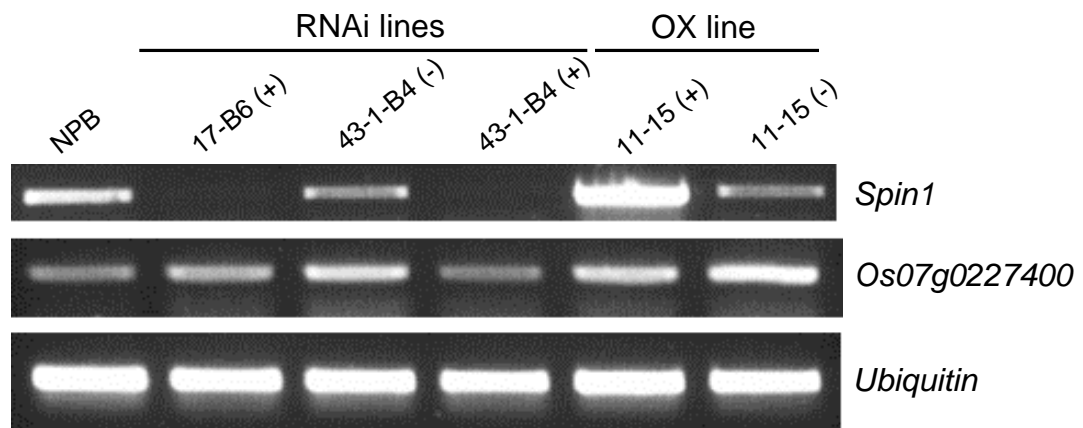

**Supplemental Figure 6.** Expression analysis of *Spin1* and its closest paralog *Os07g0227400* by RT-PCR in T5 *Spin1*-RNAi and *Spin1*-TAP lines. +/- indicates sibling containing or not the transgene, respectively.

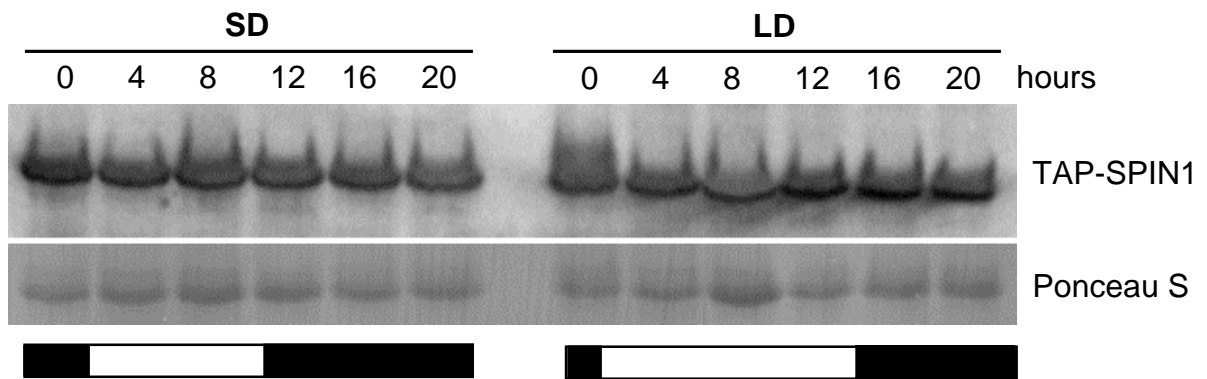

**Supplemental Figure 7.** Accumulation of TAP-SPIN1 protein in SD and LD over a 24h period. Ponceau S staining of the blot after transfer is shown as loading control. Western blot performed with PAP antibody.

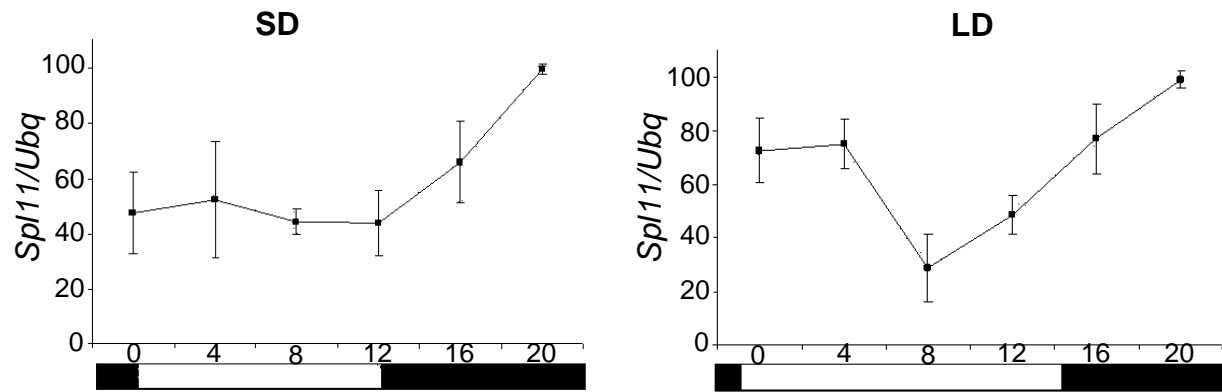

**Supplemental figure 8.** RT-PCR analysis of *Spl11* expression in Spin1-TAP (OX) line #11-15 in SD and LD over a 24h period. White and black boxes indicate light and dark periods. Error bars are +/- standard deviation from an average of three experiments.



Supplemental Table 1. Summary of yeast-two hybrid screen using SPL11-ARM as bait

| Gene name    | Independent positive clones | Interactive strength            | Homolog/putative function                                                     |
|--------------|-----------------------------|---------------------------------|-------------------------------------------------------------------------------|
| <i>Spin1</i> | 11                          | Strong                          | KH domain/Pre-mRNA processing                                                 |
| <i>Spin2</i> | 7                           | Intermediate                    | Putative myosin heavy chain                                                   |
| <i>Spin3</i> | 4                           | Between strong and intermediate | MOM-like protein                                                              |
| <i>Spin4</i> | 2                           | Between strong and intermediate | Pre-mRNA cleavage complex II protein<br>Pcf11, S-locus protein 4-like protein |
| <i>Spin5</i> | 2                           | Between strong and intermediate | Acetylglutamate kinase-like protein                                           |
| <i>Spin6</i> | 1                           | Weak                            | Rho-GTPase activating protein                                                 |
| <i>Spin7</i> | 1                           | Between strong and intermediate | No hits                                                                       |
| <i>Spin8</i> | 1                           | Intermediate                    | No hits                                                                       |

Supplemental Table 2. List of primers and constructs used in this study

| Primer        | Sequence                                                                  | Purpose                       |
|---------------|---------------------------------------------------------------------------|-------------------------------|
| SPIN1-NF      | 5'CGCGTCGACCATGTTCGGGGCTGTA CAGC3'                                        | pPC86SPIN1-N construct        |
| SPIN1-NR      | 5'CCCGCGGCCGCTACAACATGAGAA CTAG3'                                         | pPC86SPIN1-KH construct       |
| SPIN1-KHF     | 5'CGCGTCGACCAAGATTCTGCGTTTGGATG3'                                         |                               |
| SPIN1-KHR     | 5'CCCGCGGCCGCCACTGGTTTTAGCAGTT3'                                          | pPC86SPIN1-KHQ                |
| SPIN1-QR      | 5'CCCGCGGCCGCAGGATGGGGGCTGTCCTC3'                                         |                               |
| SPIN1-CR      | 5'CCCGCGGCCGCCTACTGGCCCGTTTTTCG3'                                         | pPC86SPIN1-C                  |
| Spin1-XhoI F  | 5'GCGCTCGAGCTATGTTCGGGGCTGTACAG3'                                         | To clone into pGD series      |
| Spin1-BamHI R | 5'GCGGGATCCCTACTGGCCCGTTTTTCGC3'                                          | C terminal HA (underlined)    |
| SPIN1HAR      | 5'GCGGGATCCCTAAGCGTAATCTGGAACATC<br><u>GTATGGGT</u> ACTGGCCCGTTTTTCGCGC3' |                               |
| spin1rnaif    | 5'CACCAGCCAAGAAATTATGCGG3'                                                | RNAi construct                |
| spin1rnaif    | 5'ACATGAGAAGTACTAGGGCTTGG3'                                               | Overexpression construct      |
| Spin1tap F    | 5'CACCATGTTCGGGGCTGTACAGCCC3'                                             |                               |
| Spin1tap R    | 5'CTACTGGCCCGTTTTTCGCGCGTTTC3'                                            | pGEXSPIN1 construct           |
| spin1gexF     | 5'GCGGGATCCATGTTCGGGGCTGTACAGCCC3'                                        |                               |
| spin1gexR     | 5'GCGCTCGAGCTACTGGCCCGTTTTTCGCGC3'                                        | pGEXSPIN1-N construct         |
| spin1NgexR    | 5'GCGCTCGAGCTAAACATGAGAACTAGGGC3'                                         |                               |
| SPIN1-BKHF    | 5'CCCGGATCCAAGATTCTGCGTTTGGATG3'                                          | pGEXSPIN1-KH construct        |
| SPIN1-XKHR    | 5'CCCCTCGAGCTACACTGGTTTTAGCAGTT3'                                         |                               |
| SPIN1-XCR     | 5'CCCCTCGAGCTACTGGCCCGTTTTTCG3'                                           | pGEXSPIN1-C construct         |
| 11Y2Harm-F    | 5'ATAAGCTAGCCCAGACACTGAGGAGCAGAG3'                                        | Spl11-ARM in pDBLeu           |
| 11Y2Harm-R    | 5'TCTACCATGGCTCTTGTTGCTGGACTAGGAA3'                                       |                               |
| Y2HPPC86F     | 5'TATAACGCGTTTGAATCACT3'                                                  | Screening Y2H positive clones |
| Y2HPPC86R     | 5'GTAAATTTCTGGCAAGGTAGAC3'                                                | Spin1 RT-PCR                  |
| Spin1cdF      | 5'TTAGGAGCAACCCGACGGATG3'                                                 |                               |
| Spin1cdR      | 5'GGGTCACCTCAGATGTTTCGTAGC3'                                              | Spin1 RT-PCR                  |
| UbqF          | 5'AAGAAGCTGAAGCATCCAGC3'                                                  | Ubiquitin RT-                 |

---

|           |                                 |                          |
|-----------|---------------------------------|--------------------------|
| UbqR      | 5'CCAGGACAAGATGATCTGCC3'        | PCR                      |
| Spin1NB-F | 5'GCGGTCGACATGTCGGGCCTGTACAGC3' | BiFC SPIN1 N<br>terminus |
| Spin1NB-R | 5'GCGGGATCCAACATGAGAACTAGGGC3'  |                          |
| Spin1CB-F | 5'GCGGTCGACATGAAGATTCTGCGTTTG3' | BiFC SPIN1 C<br>terminus |
| Spin1CBR  | 5'GCGGGATCCCTGGCCCGTTTTCGCGC3'  |                          |

---
